# Supplementary material for: Flora richness of a military area: discovery of a remarkable station of Serapiasneglecta in Corsica
Source: Biodivers Data J. 2022 Feb 24;10:e76375. doi: 10.3897/BDJ.10.e76375 (PMC8894324; doi:10.3897/BDJ.10.e76375)
Supplement: Supplementary material 1 — Complete list of the flora of Solenzara [file bdj-10-e76375-s001.xlsx]

## Sheet: Feuil1
Scientific names	Family	CBNC invent.	friends of PNRC invent.	ACMO invent.	Ecotonia invent.
Acacia dealbata Link	Fabaceae	1	1		1
Acacia retinodes Schltdl.	Fabaceae	1
Acacia saligna (Labill.) H.L.Wendl.	Fabaceae	1			1
Acer negundo L.	Sapindaceae				1
Aegilops geniculata Roth	Poaceae	1			1
Aegilops triuncialis L.	Poaceae	1			1
Agrostis stolonifera L.	Poaceae				1
Aira caryophyllea L.	Poaceae	1			1
Aira cupaniana Guss.	Poaceae				1
Aira elegantissima Schur	Poaceae	1			1
Alisma lanceolatum With.	Alismataceae	1			1
Allium chamaemoly L.	Amaryllidaceae				1
Allium polyanthum Schult. & Schult. f.	Amaryllidaceae	1			1
Allium triquetrum L.	Amaryllidaceae	1			1
Allium vineale L.	Amaryllidaceae	1			1
Alnus glutinosa (L.) Gaertn.	Betulaceae	1			1
Althaea officinalis L.	Malvaceae	1
Ammophila arenaria (L.) Link	Poaceae	1
Anacamptis fragrans (Pollini) R.M.Bateman	Orchidaceae	1
Anacamptis laxiflora (Lam.) R.M.Bateman, Pridgeon & M.W.Chase	Orchidaceae	1	1	1	1
Anacamptis morio (L.) Bateman, Pridgeon & Chase subsp. morio	Orchidaceae		1		1
Anacamptis papilionacea (L.) Bateman, Pridgeon & Chase	Orchidaceae		1		1
Andryala integrifolia L.	Asteraceae	1			1
Anemone coronaria L.	Ranunculaceae	1
Anisantha diandra (Roth) Tutin ex Tzvelev	Poaceae	1			1
Anisantha madritensis (L.) Nevski	Poaceae	1			1
Anisantha rubens (L.) Nevski	Poaceae				1
Anisantha sterilis (L.) Nevski	Poaceae	1			1
Anthemis arvensis L. subsp. arvensis	Asteraceae	1			1
Anthemis arvensis subsp. incrassata (Loisel.) Nyman	Asteraceae				1
Anthemis maritima L.	Asteraceae	1
Anthoxanthum odoratum L.	Poaceae	1			1
Anthoxanthum ovatum Lag.	Poaceae				1
Anthyllis hermanniae L.	Fabaceae	1
Aphanes arvensis L.	Rosaceae				1
Aphanes minutiflora (Azn.) Holub	Rosaceae				1
Arbutus unedo L.	Ericaceae	1			1
Arenaria serpyllifolia L.	Caryophyllaceae				1
Aristolochia rotunda L.	Aristolochiaceae	1
Arundo donax L.	Poaceae				1
Asparagus acutifolius L.	Asparagaceae	1			1
Asphodelus fistulosus L.	Asphodelaceae	1
Asphodelus ramosus L. subsp. ramosus	Asphodelaceae	1			1
Atriplex prostrata Boucher ex DC.	Amaranthaceae	1
Avena barbata Pott ex Link subsp. barbata	Poaceae	1			1
Baldellia ranunculoides (L.) Parl.	Alismataceae	1			1
Barbarea vulgaris W.T.Aiton	Brassicaceae				1
Bartsia trixago L.	Orobanchaceae	1			1
Bellis annua L.	Asteraceae	1			1
Bellis perennis L.	Asteraceae				1
Beta vulgaris subsp. maritima (L.) Arcang.	Amaranthaceae	1
Betula pendula Roth	Betulaceae	1
Bidens frondosa L.	Asteraceae	1
Biserrula pelecinus L.	Fabaceae	1			1
Bituminaria bituminosa (L.) C.H.Stirt.	Fabaceae	1			1
Bolboschoenus maritimus (L.) Palla	Cyperaceae	1
Brachypodium distachyon (L.) P.Beauv.	Poaceae	1			1
Brachypodium retusum (Pers.) P.Beauv.	Poaceae	1			1
Briza maxima L.	Poaceae	1			1
Briza minor L.	Poaceae	1			1
Bromus commutatus Schrad.	Poaceae				1
Bromus hordeaceus L. subsp. hordeaceus	Poaceae				1
Bunias erucago L.	Brassicaceae				1
Cakile maritima Scop.	Brassicaceae	1
Calamagrostis epigejos (L.) Roth	Poaceae	1			1
Calendula arvensis L.	Asteraceae	1			1
Callitriche brutia Petagna	Plantaginaceae				1
Callitriche obtusangula Le Gall	Plantaginaceae	1
Callitriche stagnalis Scop.	Plantaginaceae				1
Campanula erinus L.	Campanulaceae				1
Campanula rapunculus L.	Campanulaceae				1
Capsella bursa-pastoris (L.) Medik.	Brassicaceae				1
Cardamine hirsuta L.	Brassicaceae				1
Carduus pycnocephalus L.	Asteraceae	1			1
Carex divisa Huds.	Cyperaceae	1			1
Carex divulsa Stokes	Cyperaceae				1
Carex elata All.	Cyperaceae	1
Carex flacca subsp. serrulata (Biv.) Greuter	Cyperaceae	1			1
Carex hispida Willd.	Cyperaceae				1
Carex otrubae Podp.	Cyperaceae	1			1
Carex pairae F.W.Schultz	Cyperaceae	1
Carex panicea L.	Cyperaceae				1
Carex pendula Huds.	Cyperaceae	1
Carex punctata Gaudin	Cyperaceae	1			1
Carex remota L.	Cyperaceae	1			1
Carex riparia Curtis	Cyperaceae	1			1
Carex viridula Michx.	Cyperaceae	1
Carlina corymbosa L.	Asteraceae	1
Carpobrotus edulis (L.) N.E.Br.	Aizoaceae	1	1
Carthamus lanatus L.	Asteraceae	1			1
Catapodium rigidum (L.) C.E.Hubb.	Poaceae				1
Centaurium maritimum (L.) Fritsch	Gentianaceae	1			1
Centaurium tenuiflorum subsp. acutiflorum (Schott) Zeltner	Gentianaceae	1
Cephalanthera longifolia (L.) Fritsch	Orchidaceae				1
Cerastium glomeratum Thuill.	Caryophyllaceae	1			1
Cerastium pumilum Curtis	Caryophyllaceae				1
Chenopodium album L.	Amaranthaceae				1
Chondrilla juncea L.	Asteraceae	1			1
Cicendia filiformis (L.) Delarbre	Gentianaceae	1			1
Cichorium intybus L.	Asteraceae	1			1
Cirsium vulgare (Savi) Ten.	Asteraceae				1
Cistus albidus L.	Cistaceae				1
Cistus creticus L.	Cistaceae	1			1
Cistus halimifolius L.	Cistaceae				1
Cistus monspeliensis L.	Cistaceae	1			1
Cistus salviifolius L.	Cistaceae	1			1
Cladanthus mixtus (L.) Chevall.	Asteraceae	1			1
Clematis flammula L.	Ranunculaceae	1			1
Clematis vitalba L.	Ranunculaceae	1
Clinopodium nepeta (L.) Kuntze var. nepeta	Lamiaceae				1
Coleostephus myconis (L.) Cass. ex Rchb.f.	Asteraceae	1			1
Convolvulus althaeoides L.	Convolvulaceae	1			1
Convolvulus arvensis L.	Convolvulaceae	1
Convolvulus sepium L.	Convolvulaceae	1
Corrigiola littoralis L. subsp. littoralis	Caryophyllaceae				1
Corrigiola telephiifolia Pourr.	Caryophyllaceae	1			1
Cortaderia selloana (Schult. & Schult.f.) Asch. & Graebn.	Poaceae	1	1
Corynephorus articulatus (Desf.) P.Beauv.	Poaceae	1			1
Cotula coronopifolia L.	Asteraceae	1
Crassula tillaea Lest.-Garl.	Crassulaceae				1
Crataegus monogyna Jacq.	Rosaceae	1			1
Crepis bellidifolia Loisel.	Asteraceae	1
Crepis sancta (L.) Bornm.	Asteraceae				1
Crepis zacintha (L.) Loisel.	Asteraceae	1			1
Cuscuta planiflora Ten.	Convolvulaceae				1
Cynodon dactylon (L.) Pers.	Poaceae	1			1
Cynoglossum creticum Mill.	Boraginaceae				1
Cynosurus echinatus L.	Poaceae				1
Cyperus eragrostis Lam.	Cyperaceae	1			1
Cyperus longus subsp. badius (Desf.) Bonnier & Layens	Cyperaceae	1
Cytinus hypocistis (L.) L.	Cytinaceae				1
Cytinus ruber Fritsch	Cytinaceae				1
Cytisus laniger (Desf.) DC.	Cytinaceae	1			1
Cytisus spinosus (L.) Bubani	Cytinaceae				1
Cytisus villosus Pourr.	Cytinaceae	1			1
Dactylis glomerata L. subsp. glomerata	Poaceae				1
Dactylis glomerata subsp. hispanica (Roth) Nyman	Poaceae	1			1
Daphne gnidium L.	Thymelaeaceae	1			1
Datura stramonium L.	Solanaceae				1
Daucus carota subsp. carota	Apiaceae				1
Daucus carota subsp. maximus (Desf.) Ball	Apiaceae				1
Dittrichia viscosa (L.) Greuter	Asteraceae	1			1
Dorycnopsis gerardi (L.) Boiss.	Fabaceae	1			1
Echinochloa crus-galli (L.) P.Beauv.	Poaceae				1
Echium italicum L.	Boraginaceae	1			1
Echium plantagineum L.	Boraginaceae	1			1
Echium vulgare L.	Boraginaceae				1
Eleocharis multicaulis (Sm.) Desv.	Cyperaceae	1			1
Eleocharis palustris (L.) Roem. & Schult.	Cyperaceae	1			1
Eleocharis uniglumis (Link) Schult.	Cyperaceae	1
Elytrigia juncea (L.) Nevski	Poaceae	1
Epilobium parviflorum Schreb.	Onagraceae				1
Equisetum arvense L.	Equisetaceae	1
Erica arborea L.	Ericaceae	1			1
Erica scoparia L.	Ericaceae	1
Erica terminalis Salisb.	Ericaceae				1
Erigeron bonariensis L.	Asteraceae				1
Erodium botrys (Cav.) Bertol.	Geraniaceae				1
Erodium cicutarium (L.) L'Hér.	Geraniaceae	1			1
Erodium moschatum (L.) L'Hér.	Geraniaceae	1			1
Ervilia hirsuta (L.) Opiz	Fabaceae	1			1
Ervum gracile (Loisel.) DC.	Fabaceae				1
Ervum pubescens DC.	Fabaceae	1
Eryngium maritimum L.	Apiaceae	1
Eudianthe laeta (Aiton) Willk.	Caryophyllaceae	1			1
Euphorbia cuneifolia Guss.	Euphorbiaceae	1
Euphorbia exigua L.	Euphorbiaceae	1			1
Euphorbia helioscopia L.	Euphorbiaceae	1			1
Euphorbia hirsuta L.	Euphorbiaceae				1
Euphorbia maculata L.	Euphorbiaceae	1
Euphorbia peplis L.	Euphorbiaceae	1
Euphorbia peplus L.	Euphorbiaceae	1			1
Euphorbia segetalis L.	Euphorbiaceae				1
Exaculum pusillum (Lam.) Caruel	Gentianaceae	1
Foeniculum vulgare Mill.	Apiaceae	1			1
Fraxinus angustifolia Vahl	Oleaceae	1
Fraxinus ornus L.	Oleaceae	1			1
Fumaria bastardii Boreau	Papaveraceae				1
Fumaria capreolata L.	Papaveraceae				1
Fumaria officinalis L.	Papaveraceae				1
Galactites tomentosus Moench	Asteraceae	1			1
Galium aparine L.	Rubiaceae	1			1
Galium debile Desv.	Rubiaceae				1
Galium divaricatum Pourr. ex Lam.	Rubiaceae	1			1
Galium elongatum C.Presl	Rubiaceae	1			1
Galium murale (L.) All.	Rubiaceae				1
Galium parisiense L.	Rubiaceae	1			1
Gastridium phleoides (Nees & Meyen) C.E.Hubb.	Poaceae				1
Gastridium ventricosum (Gouan) Schinz & Thell.	Poaceae				1
Gaudinia fragilis (L.) P.Beauv.	Poaceae	1			1
Genista monspessulana (L.) L.A.S.Johnson	Fabaceae				1
Geranium columbinum L.	Geraniaceae	1			1
Geranium dissectum L.	Geraniaceae	1
Geranium molle L.	Geraniaceae	1			1
Geranium purpureum Vill.	Geraniaceae	1			1
Geranium robertianum L.	Geraniaceae	1
Geranium rotundifolium L.	Geraniaceae	1			1
Gladiolus dubius Guss.	Iridaceae	1			1
Glyceria fluitans (L.) R.Br.	Poaceae	1			1
Gomphocarpus fruticosus (L.) R.Br.	Apocynaceae	1			1
Gratiola officinalis L.	Plantaginaceae	1
Hainardia cylindrica (Willd.) Greuter	Poaceae	1
Halimione portulacoides (L.) Aellen	Amaranthaceae	1
Halimium halimifolium L.	Cistaceae	1
Hedypnois rhagadioloides (L.) F.W.Schmidt	Asteraceae	1			1
Helichrysum italicum (Roth) G.Don	Asteraceae				1
Holcus lanatus L.	Poaceae	1			1
Hordeum marinum Huds.	Poaceae	1			1
Hordeum murinum L. subsp. murinum	Poaceae				1
Hordeum murinum subsp. glaucum (Steud.) Tzvelev	Poaceae				1
Hordeum murinum subsp. leporinum (Link) Arcang.	Poaceae	1
Hydrocotyle vulgaris L.	Apiaceae	1
Hyoseris radiata L.	Asteraceae	1			1
Hyparrhenia sinaica (Delile) Llaurado ex G.López	Poaceae				1
Hypericum australe Ten.	Hypericaceae				1
Hypericum perforatum var. angustifolium DC.	Hypericaceae	1			1
Hypericum tetrapterum Fr.	Hypericaceae				1
Hypochaeris achyrophorus L.	Asteraceae	1			1
Hypochaeris glabra L.	Asteraceae	1			1
Hypochaeris radicata L.	Asteraceae	1			1
Illecebrum verticillatum L.	Caryophyllaceae	1			1
Iris pseudacorus L.	Iridaceae	1			1
Isoetes durieui Bory	Isoetaceae				1
Isoetes histrix Bory	Isoetaceae				1
Isolepis cernua (Vahl) Roem. & Schult.	Cyperaceae	1			1
Isolepis setacea (L.) R. Br.	Cyperaceae				1
Jacobaea erratica (Bertol.) Fourr.	Asteraceae	1
Jasione montana L.	Campanulaceae	1			1
Juncus acutus L. subsp. acutus	Juncaceae				1
Juncus articulatus L.	Juncaceae	1			1
Juncus bufonius L.	Juncaceae	1			1
Juncus bulbosus L.	Juncaceae				1
Juncus capitatus Weigel	Juncaceae				1
Juncus conglomeratus L.	Juncaceae	1			1
Juncus effusus L.	Juncaceae	1			1
Juncus littoralis C.A.Mey.	Juncaceae				1
Juncus maritimus Lam.	Juncaceae	1			1
Juncus pygmaeus Rich. ex Thuill.	Juncaceae	1			1
Juncus subulatus Forssk.	Juncaceae	1
Juncus tenageia Ehrh. ex L.f.	Juncaceae	1			1
Juncus tenuis Willd.	Juncaceae				1
Kickxia cirrhosa (L.) Fritsch	Plantaginaceae	1
Kickxia commutata (Bernh. ex Rchb.) Fritsch subsp. commutata	Plantaginaceae	1
Knautia integrifolia (L.) Bertol.	Caprifoliaceae	1
Lagurus ovatus L.	Poaceae	1			1
Lamium amplexicaule L.	Lamiaceae				1
Lamium bifidum Cirillo	Lamiaceae				1
Lathyrus angulatus L.	Fabaceae	1			1
Lathyrus annuus L.	Fabaceae				1
Lathyrus aphaca L.	Fabaceae	1			1
Lathyrus cicera L.	Fabaceae				1
Lathyrus clymenum L.	Fabaceae	1			1
Lathyrus hirsutus L.	Fabaceae	1			1
Lathyrus latifolius L.	Fabaceae	1			1
Lathyrus nissolia L.	Fabaceae				1
Lathyrus sphaericus Retz.	Fabaceae	1			1
Lavandula stoechas L. subsp. stoechas	Lamiaceae	1
Legousia falcata (Ten.) Fritsch subsp. falcata	Campanulaceae				1
Leontodon saxatilis Lam. subsp. saxatilis	Asteraceae				1
Leontodon tuberosus L.	Asteraceae	1
Limodorum abortivum (L.) Sw.	Orchidaceae		1	1
Limonium narbonense Mill.	Plumbaginaceae	1
Linaria pelisseriana (L.) Mill.	Plantaginaceae	1			1
Linaria vulgaris Mill.	Plantaginaceae	1
Linum trigynum L.	Linaceae	1			1
Linum usitatissimum subsp. angustifolium (Huds.) Thell.	Linaceae	1			1
Logfia gallica (L.) Coss. & Germ.	Asteraceae	1			1
Logfia minima (Sm.) Dumort.	Asteraceae	1
Lolium multiflorum Lam.	Poaceae	1			1
Lolium perenne L.	Poaceae				1
Lolium x boucheanum Kunth	Poaceae				1
Lonicera etrusca Santi	Caprifoliaceae				1
Lonicera implexa Aiton	Caprifoliaceae	1			1
Lotus angustissimus L.	Fabaceae	1			1
Lotus conimbricensis Brot.	Fabaceae	1			1
Lotus corniculatus L.	Fabaceae				1
Lotus creticus L.	Fabaceae	1			1
Lotus cytisoides L.	Fabaceae				1
Lotus glaber Mill.	Fabaceae	1
Lotus hispidus Desf. ex DC.	Fabaceae	1			1
Lotus ornithopodioides L.	Fabaceae	1			1
Lotus parviflorus Desf.	Fabaceae	1			1
Lotus pedunculatus Cav.	Fabaceae	1			1
Ludwigia palustris (L.) Elliott	Onagraceae	1			1
Lupinus angustifolius L.	Fabaceae	1			1
Lupinus micranthus Guss.	Fabaceae				1
Lychnis flos-cuculi L.	Caryophyllaceae				1
Lycopus europaeus L.	Lamiaceae	1			1
Lysimachia arvensis (L.) U.Manns & Anderb. subsp. arvensis	Primulaceae	1			1
Lysimachia arvensis subsp. latifolia (L.) Peruzzi	Primulaceae	1			1
Lysimachia arvensis subsp. parviflora (Hoffmanns. & Link) Peruzzi	Primulaceae	1			1
Lysimachia linum-stellatum L.	Primulaceae				1
Lysimachia minima (L.) U.Manns & Anderb.	Primulaceae	1			1
Lysimachia vulgaris L.	Primulaceae	1			1
Lythrum borysthenicum (Schrank) Litv.	Lythraceae	1
Lythrum hyssopifolia L.	Lythraceae	1			1
Lythrum portula (L.) D.A.Webb	Lythraceae				1
Lythrum salicaria L.	Lythraceae	1			1
Malcolmia ramosissima (Desf.) Gennari	Brassicaceae				1
Malva multiflora (Cav.) Soldano & Banfi & Galasso	Malvaceae	1			1
Malva punctata (L.) Alef.	Malvaceae	1			1
Malva sylvestris L.	Malvaceae	1			1
Matthiola sinuata (L.) W.T.Aiton	Brassicaceae	1
Medicago arabica (L.) Huds.	Fabaceae	1
Medicago littoralis Rohde ex Loisel.	Fabaceae	1
Medicago marina L.	Fabaceae	1
Medicago minima L.	Fabaceae	1			1
Medicago murex subsp. sphaerocarpos (Bertol.) I.Lesins & K.A.Lesins	Fabaceae	1			1
Medicago murex Willd. subsp. murex	Fabaceae				1
Medicago orbicularis (L.) Bartal.	Fabaceae	1
Medicago polymorpha L.	Fabaceae	1			1
Medicago praecox DC.	Fabaceae				1
Medicago truncatula Gaertn.	Fabaceae	1			1
Melica minuta L.	Poaceae	1			1
Melilotus indicus (L.) All.	Fabaceae	1
Melilotus officinalis (L.) Lam.	Fabaceae				1
Melilotus spicatus (Sm.) Breistr.	Fabaceae	1			1
Mentha aquatica L.	Lamiaceae	1			1
Mentha pulegium L.	Lamiaceae	1			1
Micromeria graeca (L.) Benth. ex Rchb. subsp. graeca	Micromeria	1			1
Misopates orontium (L.) Raf.	Plantaginaceae				1
Moenchia erecta (L.) Gaertn., Mey. & Scherb.	Caryophyllaceae				1
Muscari comosum (L.) Mill.	Asparagaceae	1			1
Myosotis arvensis (L.) Hill	Boraginaceae				1
Myosotis laxa subsp. cespitosa (Schultz) Hyl. ex Nordh.	Boraginaceae	1
Myriophyllum alternifolium DC.	Haloragaceae	1
Myrtus communis L.	Myrtaceae	1			1
Narcissus tazetta L.	Amaryllidaceae				1
Odontites luteus (L.) Clairv.	Orobanchaceae	1			1
Oenanthe fistulosa L.	Apiaceae	1
Oenanthe lachenalii C.C.Gmel.	Apiaceae	1
Oenanthe pimpinelloides L.	Apiaceae	1			1
Oenanthe silaifolia M.Bieb.	Apiaceae	1
Olea europaea L.	Oleaceae	1			1
Oloptum miliaceum (L.) Röser & Hamasha	Poaceae	1			1
Omalotheca sylvatica (L.) Sch.Bip. & F.W.Schultz	Asteraceae				1
Ophioglossum lusitanicum L.	Ophioglossaceae	1			1
Ophioglossum vulgatum L.	Ophioglossaceae	1
Ornithopus compressus L.	Fabaceae	1			1
Ornithopus pinnatus (Mill.) Druce	Fabaceae	1			1
Osmunda regalis L.	Osmundaceae	1
Oxalis corniculata L.	Oxalidaceae				1
Oxalis pes-caprae L.	Oxalidaceae				1
Pancratium maritimum L.	Amaryllidaceae	1
Papaver rhoeas L.	Papaveraceae	1			1
Papaver somniferum L.	Papaveraceae				1
Parentucellia latifolia (L.) Caruel	Orobanchaceae				1
Parentucellia viscosa (L.) Caruel	Orobanchaceae	1			1
Paronychia argentea Lam.	Caryophyllaceae	1			1
Paronychia echinulata Chater	Caryophyllaceae				1
Paspalum dilatatum Poir.	Poaceae				1
Paspalum distichum L.	Poaceae	1
Persicaria decipiens (R.Br.) K.L.Wilson	Polygonaceae	1			1
Petrorhagia prolifera (L.) P.W.Ball & Heywood	Caryophyllaceae				1
Petrorhagia velutina (Guss.) P.W.Ball & Heywood	Caryophyllaceae	1			1
Phagnalon saxatile (L.) Cass.	Asteraceae				1
Phelipanche nana (Reut.) Soják	Orobanchaceae				1
Phillyrea angustifolia L.	Oleaceae	1			1
Phillyrea latifolia L.	Oleaceae	1
Phillyrea media L.	Oleaceae	1			1
Phragmites australis (Cav.) Trin. ex Steud.	Poaceae	1			1
Picris hieracioides L.	Asteraceae				1
Pinus nigra subsp. laricio Palib. ex Maire	Pinaceae	1			1
Pinus pinaster Aiton	Pinaceae	1			1
Pistacia lentiscus L.	Anacardiaceae	1			1
Plantago afra L.	Plantaginaceae				1
Plantago bellardii All.	Plantaginaceae	1			1
Plantago coronopus L.	Plantaginaceae	1			1
Plantago lanceolata L.	Plantaginaceae	1			1
Poa annua L.	Poaceae	1			1
Poa bulbosa L.	Poaceae				1
Poa infirma Kunth	Poaceae				1
Poa trivialis L.	Poaceae	1			1
Polycarpon tetraphyllum (L.) L.	Caryophyllaceae				1
Polygala vulgaris L.	Polygalaceae				1
Polygonum aviculare L.	Polygonaceae	1
Polypogon maritimus Willd.	Poaceae	1
Polypogon monspeliensis (L.) Desf.	Poaceae	1			1
Polypogon subspathaceus Req.	Poaceae				1
Polypogon viridis (Gouan) Breistr.	Poaceae				1
Populus nigra subsp. neapolitana (Ten.) Maire	Salicaceae				1
Populus tremula L.	Salicaceae	1
Potamogeton natans L.	Potamogetonaceae	1
Potentilla pedata Willd. Ex Hornem.	Rosaceae				1
Potentilla reptans L.	Rosaceae	1			1
Poterium sanguisorba L.	Rosaceae	1			1
Prunella vulgaris L.	Lamiaceae	1			1
Prunus spinosa L.	Rosaceae	1
Pseudorlaya pumila (L.) Grande	Apiaceae	1
Psilurus incurvus (Gouan) Schinz & Thell.	Poaceae	1
Pteridium aquilinum (L.) Kuhn	Dennstaedtiaceae	1			1
Pulicaria dysenterica (L.) Bernh.	Asteraceae				1
Pulicaria odora (L.) Rchb.	Asteraceae	1			1
Pyrus spinosa Forssk.	Rosaceae	1			1
Quercus ilex L.	Fagaceae	1			1
Quercus pubescens Willd.	Fagaceae	1
Quercus suber L.	Fagaceae	1			1
Radiola linoides Roth	Linaceae	1			1
Ranunculus bulbosus L.	Ranunculaceae	1
Ranunculus flammula L.	Ranunculaceae				1
Ranunculus lingua L.	Ranunculaceae	1
Ranunculus muricatus L.	Ranunculaceae	1
Ranunculus ophioglossifolius Vill.	Ranunculaceae	1			1
Ranunculus peltatus Schrank	Ranunculaceae	1
Ranunculus repens L.	Ranunculaceae	1			1
Ranunculus revelierei Boreau	Ranunculaceae	1			1
Ranunculus sardous Crantz	Ranunculaceae	1			1
Ranunculus trilobus Desf.	Ranunculaceae	1
Ranunculus velutinus Ten.	Ranunculaceae				1
Raphanus raphanistrum subsp. landra (Moretti ex DC.) Bonnier & Layens	Brassicaceae				1
Reichardia picroides (L.) Roth	Asteraceae	1			1
Reseda luteola L.	Resedaceae				1
Romulea columnae Sebast & Mauri	Iridaceae				1
Romulea ramiflora Ten.	Iridaceae	1			1
Rosa canina L.	Rosaceae	1
Rosa sempervirens L.	Rosaceae	1			1
Rostraria cristata (L.) Tzvelev	Poaceae	1			1
Rubia peregrina subsp. longifolia (Poir.) O.Bolòs	Rubiaceae	1
Rubia peregrina subsp. requienii (Duby) Cardona & Sierra	Rubiaceae				1
Rubus ulmifolius Schott	Rosaceae	1
Rumex acetosella L.	Polygonaceae	1
Rumex bucephalophorus L.	Polygonaceae				1
Rumex conglomeratus Murray	Polygonaceae	1
Rumex crispus L.	Polygonaceae	1			1
Rumex obtusifolius L.	Polygonaceae				1
Rumex pulcher L.	Polygonaceae	1			1
Ruppia maritima L.	Ruppiaceae	1
Sagina apetala Ard.	Caryophyllaceae				1
Sagina procumbens L.	Caryophyllaceae				1
Sagina subulata var. gracilis Foucaud & Simon	Caryophyllaceae				1
Salicornia ramosissima L.	Amaranthaceae	1
Salix apennina A.K.Skvortsov	Salicaceae	1
Salix atrocinerea Brot.	Salicaceae	1			1
Salix caprea L.	Salicaceae				1
Salix cinerea L.	Salicaceae				1
Salsola kali L.	Amaranthaceae	1
Salvia verbenaca L.	Lamiaceae				1
Samolus valerandi L.	Primulaceae	1
Santolina corsica Jord. & Fourr.	Asteraceae				1
Saponaria officinalis L.	Caryophyllaceae	1
Sarcocornia fruticosa (L.) L.	Amaranthaceae	1
Scabiosa atropurpurea L.	Caprifoliaceae				1
Schedonorus arundinaceus subsp. corsicus (Hack.) Foggi & Signorini	Poaceae	1			1
Schoenoplectus lacustris (L.) Palla	Cyperaceae	1			1
Schoenus nigricans L.	Cyperaceae	1			1
Scirpoides holoschoenus (L.) Soják subsp. holoschoenus	Cyperaceae	1
Scolymus hispanicus L.	Asteraceae	1
Scorpiurus subvillosus L.	Fabaceae	1			1
Scrophularia peregrina L.	Scrophulariaceae				1
Sedum caespitosum (Cav.) DC.	Crassulaceae				1
Senecio vulgaris L. subsp. vulgaris	Asteraceae	1			1
Serapias cordigera L.	Orchidaceae	1	1		1
Serapias lingua L.	Orchidaceae	1	1	1	1
Serapias neglecta De Not.	Orchidaceae	1	1		1
Serapias nurrica Corrias	Orchidaceae			1
Serapias olbia Verg.	Orchidaceae				1
Serapias parviflora Parl.	Orchidaceae	1	1	1	1
Setaria parviflora (Poir.) Kerguélen	Poaceae				1
Sherardia arvensis L.	Rubiaceae	1			1
Sideritis romana L.	Lamiaceae				1
Silene flos-cuculi L.	Caryophyllaceae	1
Silene gallica L.	Caryophyllaceae	1			1
Silene latifolia Poir.	Caryophyllaceae	1			1
Silene nicaeensis All.	Caryophyllaceae	1
Silybum marianum (L.) Gaertn.	Asteraceae	1			1
Sinapis alba L.	Brassicaceae				1
Sisymbrium officinale (L.) Scop.	Brassicaceae				1
Sixalix atropurpurea subsp. maritima (L.) Fiori	Caprifoliaceae	1
Smilax aspera L.	Smilacaceae	1			1
Smyrnium olusatrum L.	Apiaceae				1
Solanum nigrum L.	Solanaceae	1			1
Solenopsis laurentia (L.) C.Presl	Campanulaceae	1			1
Sonchus asper (L.) Hill	Asteraceae	1			1
Sonchus oleraceus L.	Asteraceae	1			1
Spartium junceum L.	Fabaceae	1
Spergula pentandra L.	Caryophyllaceae				1
Spergula rubra (L.) D.Dietr.	Caryophyllaceae				1
Stachys arvensis (L.) L.	Lamiaceae	1			1
Stellaria media (L.) Vill.	Caryophyllaceae				1
Stellaria pallida (Dumort.) Piré	Caryophyllaceae				1
Tamarix africana Poir.	Tamaricaceae	1	1		1
Tamarix gallica L.	Tamaricaceae				1
Theligonum cynocrambe L.	Rubiaceae	1
Tolpis umbellata Bertol.	Asteraceae	1			1
Tragopogon dubius Scop.	Asteraceae				1
Tragopogon porrifolius L.	Asteraceae	1			1
Trifolium angustifolium L.	Fabaceae	1			1
Trifolium arvense L.	Fabaceae	1			1
Trifolium bocconei Savi	Fabaceae	1			1
Trifolium campestre Schreb.	Fabaceae	1			1
Trifolium cernuum Brot.	Fabaceae	1
Trifolium cherleri L.	Fabaceae	1			1
Trifolium diffusum Ehrh.	Fabaceae				1
Trifolium fragiferum L.	Fabaceae	1
Trifolium glomeratum L.	Fabaceae	1			1
Trifolium hirtum All.	Fabaceae				1
Trifolium incarnatum subsp. molinerii (Balb. ex Hornem.) DC.	Fabaceae	1
Trifolium lappaceum L.	Fabaceae	1			1
Trifolium ligusticum Balb. ex Loisel.	Fabaceae	1			1
Trifolium michelianum Savi	Fabaceae	1
Trifolium micranthum Viv.	Fabaceae	1			1
Trifolium nigrescens Viv.	Fabaceae	1			1
Trifolium patens Schreb.	Fabaceae				1
Trifolium pratense L.	Fabaceae	1			1
Trifolium repens L.	Fabaceae	1			1
Trifolium resupinatum L.	Fabaceae	1			1
Trifolium scabrum L. subsp. scabrum	Fabaceae	1
Trifolium scabrum subsp. lucanicum (Guss.) Arcang.	Fabaceae				1
Trifolium squamosum L.	Fabaceae				1
Trifolium stellatum L.	Fabaceae	1			1
Trifolium striatum L.	Fabaceae	1			1
Trifolium strictum L.	Fabaceae	1
Trifolium subterraneum L.	Fabaceae				1
Trifolium tomentosum L.	Fabaceae	1			1
Tuberaria guttata (L.) Fourr.	Cistaceae				1
Tuberaria praecox (Salzm. ex Boiss. & Reut.) Grosser	Cistaceae				1
Typha angustifolia L.	Typhaceae	1
Typha latifolia L.	Typhaceae				1
Ulmus minor Mill.	Ulmaceae	1			1
Urospermum dalechampii (L.) Scop. ex F.W.Schmidt	Asteraceae	1			1
Urospermum picroides (L.) Scop. ex F.W.Schmidt	Asteraceae	1			1
Utricularia australis R.Br.	Lentibulariaceae	1
Valerianella microcarpa Loisel.	Caprifoliaceae				1
Verbascum sinuatum L.	Scrophulariaceae	1			1
Verbena officinalis L.	Verbenaceae	1
Veronica arvensis L.	Plantaginaceae	1			1
Veronica cymbalaria Bodard	Plantaginaceae				1
Veronica persica Poir.	Plantaginaceae	1			1
Veronica scutellata L.	Plantaginaceae	1			1
Vicia altissima Desf.	Fabaceae	1			1
Vicia angustifolia L.	Fabaceae	1			1
Vicia bithynica (L.) L.	Fabaceae	1			1
Vicia dasycarpa Ten.	Fabaceae	1
Vicia disperma DC.	Fabaceae				1
Vicia incana Gouan	Fabaceae				1
Vicia lathyroides L.	Fabaceae				1
Vicia lutea L.	Fabaceae				1
Vicia macrocarpa (Moris) Bertol.	Fabaceae	1			1
Vicia pseudocracca Bertol.	Fabaceae	1			1
Vicia segetalis Thuill.	Fabaceae	1			1
Vicia serratifolia Jacq.	Fabaceae				1
Vicia villosa Roth	Fabaceae				1
Viola arvensis Murray	Violaceae	1			1
Viola kitaibeliana Schult.	Violaceae				1
Viola reichenbachiana Jord. ex Boreau	Violaceae	1
Vulpia bromoides (L.) Gray	Poaceae				1
Vulpia ciliata Dumort.	Poaceae	1			1
Vulpia fasciculata (Forssk.) Fritsch	Poaceae	1
Vulpia ligustica (All.) Link	Poaceae	1			1
Vulpia muralis (Kunth) Nees	Poaceae				1
Vulpia myuros (L.) C.C.Gmel.	Poaceae	1			1
Xanthium orientale subsp. italicum (Moretti) Greuter	Asteraceae	1			1
